1 **Awake ripples enhance emotional memory encoding in the human brain**

2

3

4 Haoxin Zhang<sup>1,2\*#</sup>, Ivan Skelin<sup>1#</sup>, Shiting Ma<sup>1</sup>, Michelle Paff<sup>3</sup>, Michael A.

5 Yassa<sup>1,4,5</sup>, Robert T. Knight<sup>6,7</sup> & Jack J. Lin<sup>1,2,4\*</sup>

6

7 <sup>1</sup>*Department of Neurology, University of California Irvine, Irvine, 92603, CA, USA*

8 <sup>2</sup>*Department of Biomedical Engineering, University of California Irvine, Irvine, 92603,*  
9 *CA, USA*

10 <sup>3</sup>*Department of Neurosurgery, University of California Irvine, Irvine, 92603, CA, USA*

11 <sup>4</sup>*Department of Neurobiology and Behavior, University of California Irvine, Irvine,*  
12 *92603, CA, USA*

13 <sup>5</sup>*Department of Psychological Science, University of California Irvine, Irvine, 92603,*  
14 *CA, USA*

15 <sup>6</sup>*Department of Psychology, University of California Berkeley, 130 Barker Hall,*  
16 *Berkeley, 94720, CA, USA*

17 <sup>7</sup>*Helen Wills Neuroscience Institute, University of California Berkeley, Berkeley, 94720,*  
18 *CA, USA*

19

20

21

22 \* Corresponding author

23 E-mail: haoxinz1@uci.edu

24 E-mail: linjj@hs.uci.edu

25 # Equal contribution

26

27 **Abstract**

28

29 Intracranial recordings from the human amygdala and the hippocampus during an  
30 emotional memory encoding and discrimination task reveal increased awake sharp-  
31 wave/ripples (aSWR) after encoding of emotional compared to neutral stimuli. Further,  
32 post-encoding aSWR-locked memory reinstatement in the amygdala and the  
33 hippocampus was predictive of later memory discrimination. These findings provide  
34 electrophysiological evidence that post-encoding aSWRs enhance memory for emotional  
35 events.

36 **Main**

37

38 Multiple mechanisms have been proposed to explain the prioritized encoding of  
39 emotional experiences<sup>1-3</sup>, including the neuromodulatory effects on plasticity and the  
40 interplay between the amygdala and the hippocampus<sup>1,4,5</sup>. Several studies have found  
41 memory reinstatement during the immediate post-encoding period to be predictive of later  
42 memory performance<sup>6,7</sup>. Sharp-wave/ripples (SWRs) are transient hippocampal  
43 oscillations (80-150 Hz), associated with synchronous neural activation in the  
44 hippocampus and the amygdala<sup>8,9</sup>, and are implicated in the binding of anatomically  
45 distributed memory traces<sup>10</sup>. Behaviorally relevant reactivation of emotional memory  
46 occurs during aSWRs<sup>11</sup>, and disruptions of post-experience aSWR interfere with memory  
47 utilization<sup>12</sup>. Based on these findings, we hypothesized that aSWRs occurring  
48 immediately after stimulus encoding (post-encoding) facilitate emotional memory  
49 discrimination through the coordinated hippocampal-amygdala memory reinstatement.  
50 Using intracranial electroencephalographic (iEEG) recordings in epilepsy patients during  
51 the performance of an emotional encoding and discrimination task, we first confirm  
52 reports of better discrimination memory for arousing stimuli<sup>3</sup>. Next, we demonstrate that  
53 the number of aSWR events immediately after encoding is associated with both stimulus-  
54 induced arousal and the accuracy of later discrimination. Finally, the coordinated memory  
55 reinstatement between the amygdala and the hippocampus during post-encoding aSWRs  
56 is predictive of later memory discrimination performance, with the amygdala  
57 reinstatement showing a directional influence on the hippocampal reinstatement.  
58 Together, these findings provide evidence for aSWRs-mediated memory reinstatement in  
59 the amygdala and hippocampus as a mechanism accounting for better remembering of  
60 emotional experiences.

61

62 We performed simultaneous iEEG recordings from the amygdala ( $n_{electrode} = 20$ ) and  
63 the hippocampus ( $n_{electrode} = 17$ , Fig. 2a) in 7 human subjects, while performing an  
64 emotional memory encoding and discrimination task<sup>13,14</sup> (Methods, Fig. 1a). During the  
65 encoding stage, subjects were presented with a stimulus (image; stimulus encoding) and  
66 asked to rate the stimulus valence as negative, neutral, or positive (post-  
67 encoding/response). During the retrieval stage, subjects were presented with one of the 3  
68 types of stimuli - Repeats (identical), Lure (slightly different) or Novel (stimuli not seen  
69 during encoding) - and classified each stimulus as “New” or “Old.”

70

71 Memory discrimination is defined as the correct classification of: 1) Repeat stimuli as  
72 Old, 2) Novel stimuli as New, or 3) Lure stimuli as New. Subjects classified Repeat stimuli  
73 and Novel stimuli with high accuracy (Repeat:  $89.4 \pm 2.4\%$ , Novel:  $93.9 \pm 1.4\%$ ; Fig. 1b).  
74 Memory discrimination accuracy was lower for Lure stimuli, relative to both Repeat or  
75 Novel stimuli (Lure:  $61.5 \pm 3.7\%$ ;  $p_{\text{Novel vs Lure}} < 0.001$ ,  $t = 8.36$ ;  $p_{\text{Repeat vs Lure}} < 0.001$ ,  $t =$   
76  $6.13$ , paired t-test), reflecting similarity-induced memory interference. Indeed, there was a  
77 strong negative association between subjects' stimulus discrimination ability and stimulus  
78 similarity rating ( $p = 0.039$ ,  $t = -2.06$ , see Methods, Fig. 1c-d). Stimulus-induced arousal  
79 (irrespective of valence) was associated with better memory discrimination, confirming  
80 previous reports<sup>1-3</sup> ( $p = 0.047$ ,  $t = 1.98$ , Fig. 1c-d, Extended Data Fig. 1).

81

82 We defined the post-encoding period as the interval between stimulus offset and  
83 subjects' stimulus valence rating response (Fig. 1a). We tested the association of post-  
84 encoding aSWR occurrence (i.e., the number of aSWRs) with the stimulus emotional  
85 content (stimulus-induced arousal and valence) and correct discrimination during  
86 retrieval. Higher post-encoding aSWR occurrence was associated with stimulus-induced  
87 arousal ( $p = 0.03$ ,  $z = -2.2$ , Wilcoxon signed-rank test, Fig. 2c) and also predicted correct  
88 discrimination during retrieval ( $p = 0.03$ ,  $z = -2.2$ , Wilcoxon signed-rank test, Fig. 2c), but  
89 was not associated with stimulus valence ( $p = 0.77$ ,  $F(2, 15) = 0.25$ , one-way ANOVA;  
90 Extended Data Fig. 3). Taken together, these results provide the first report of post-  
91 encoding aSWRs as a potential electrophysiological mechanism for enhanced memory  
92 discrimination of arousing stimuli, previously characterized at behavioral level<sup>2,3,15</sup>.  
93 Furthermore, the positive associations between aSWRs and stimulus-induced  
94 arousal/later discrimination were present in all individual subjects (Fig. 2c). The post-  
95 encoding response time (RT) did not differ based on stimulus-induced arousal ( $p = 0.2$ ,  $z$   
96  $= 0.7$ ,  $RT_{\text{high-arousal}} = 0.8 \pm 0.1$  sec;  $RT_{\text{low-arousal}} = 0.6 \pm 0.2$  sec) or later discrimination ( $p =$   
97  $0.25$ ,  $z = 0.6$ ,  $RT_{\text{correct}} = 0.7 \pm 0.2$  sec,  $RT_{\text{incorrect}} = 0.7 \pm 0.3$ , Wilcoxon signed-rank test).  
98 Therefore, the associations between stimulus-induced arousal or correct discrimination  
99 and post-encoding aSWR occurrence were unrelated to post-encoding duration.  
100 Associations between aSWR and stimulus-induced arousal/later correct discrimination  
101 accuracy were selective for the post-encoding time window. These relationships were  
102 absent for the stimulus encoding or the retrieval task stage ( $p > 0.05$ , Wilcoxon signed-  
103 rank test; Fig. 2c, Extended Data Fig. 3, 4). The aSWRs probability was significantly

104 higher during low theta power periods (Extended Data Fig. 5), consistent with  
105 observations that cholinergic tone promotes theta oscillations and suppresses SWRs<sup>10,12</sup>.  
106 In addition, aSWRs did not overlap with increased broadband gamma power, suggesting  
107 that aSWRs are distinct from non-specific broadband power fluctuations<sup>16</sup> (Extended Data  
108 Fig. 5).

109

110 Recent studies suggest that post-encoding memory reinstatement supports  
111 successful subsequent memory retrieval<sup>6,7</sup>. Meanwhile SWR is associated with  
112 reactivation of pre-established neuronal patterns<sup>17</sup>. We hypothesized that memory  
113 reinstatement during the post-encoding aSWR window could enhance later memory  
114 discrimination. Distinct neural populations have been proposed to represent individual  
115 stimuli, resulting in stimulus-specific high-frequency activity (HFA) patterns<sup>18,19</sup>. We, thus,  
116 quantified memory reinstatement as the Spearman correlation between HFA power  
117 spectral vectors (PSVs), for each combination of the encoding-response time bins from  
118 the same trial (Extended Data Fig. 6). Next, we computed the average reinstatement  
119 activity during  $\pm 250$  msec around post-encoding aSWR peaks. The reinstatement  
120 significance was determined relative to a null distribution, obtained by circular jittering of  
121 aSWR timestamps. The post-encoding aSWR-locked memory reinstatement was  
122 stronger for arousing and correctly discriminated stimuli (Extended Data Fig. 7). To  
123 assess specific contributions of the amygdala and the hippocampus to this phenomenon,  
124 we calculated post-encoding memory reinstatement for each region, relative to aSWR  
125 peak (Fig. 3a). The significant reinstatement period in the amygdala consisted of two  
126 intervals, the first starting slightly earlier and overlapping with the hippocampal  
127 reinstatement (-105 to -50 msec), and a second period following the hippocampal  
128 reinstatement (40 to 200 msec). The significant reinstatement period in the hippocampus  
129 lasted from -100 to 50 msec (Fig. 3b). These results demonstrated region-specific timing  
130 of the post-encoding aSWR-locked memory reinstatement in the amygdala and the  
131 hippocampus. Next, we tested for the temporal compression<sup>17</sup> of post-encoding aSWR-  
132 locked reinstatement (no compression, 2x, 4x, and 6x compression) and showed the  
133 strongest aSWR-locked reinstatement with no compression (Extended Data Fig. 8). We  
134 then analyzed the association of the post-encoding memory reinstatement with the  
135 stimulus-induced arousal and later discrimination. Remarkably, we observed a region-  
136 specific double dissociation. Specifically, the amygdala, not the hippocampus, showed a  
137 positive association between aSWR-locked memory reinstatements and the stimulus-

138 induced arousal (AMY: -80 to -10 msec,  $p = 0.035$ ; HPC:  $p > 0.05$ , see Methods; Fig. 3c).  
139 In contrast, the hippocampus, but not the amygdala, revealed a positive association  
140 between aSWR-locked memory reinstatement and later correct discrimination (AMY:  $p >$   
141  $0.05$ ; HPC: -15 to 90 msec,  $p = 0.008$ , see Methods; Fig. 3c). To summarize, post-  
142 encoding aSWR-locked memory reinstatements in the amygdala and the hippocampus  
143 followed distinct temporal dynamics and were associated with reactivation of distinct  
144 aspects of encoded stimuli (i.e., the amygdala for stimulus-induced arousal and the  
145 hippocampus for later discrimination accuracy).

146

147 In rodents, the coordinated memory reactivation in the amygdala and hippocampus  
148 during sleep SWRs is proposed to bind neuronal ensembles encoding emotional and  
149 spatial information, respectively<sup>20</sup>. We reasoned that a similar interaction between the  
150 amygdala and the hippocampus exists in which cross-regional post-encoding aSWR-  
151 locked memory reinstatement facilitates later discrimination. We hypothesized that the  
152 reinstatement in both structures co-occurs during the same aSWR events and follows a  
153 consistent temporal dynamic. To test this, we separately computed aSWR-locked joint  
154 memory reinstatement for the correctly and incorrectly discriminated stimuli (Methods). A  
155 significant joint aSWR-locked memory reinstatement in the amygdala and hippocampus  
156 was present during the post-encoding period only for correctly discriminated stimuli (Fig.  
157 3d; Extended Data Fig. 9). Specifically, the amygdala reinstatement preceded the  
158 hippocampal reinstatement by ~100 msec. Further, mutual information analysis showed a  
159 significant unidirectional influence from the amygdala to the hippocampus before aSWR  
160 peak (-70 to -30 msec,  $p = 0.038$ ; see Methods; Fig. 3e). To conclude, aSWR-mediated  
161 coordination of memory reinstatement in the amygdala and the hippocampus promotes  
162 later successful discrimination.

163

164 Rodent studies have implicated the SWRs in the retrieval and consolidation of  
165 emotional memory. However, it is unclear whether it supports the memory benefits of  
166 emotional experience<sup>21</sup>. Our study reveals an association of higher aSWR occurrence  
167 with stimulus-induced arousal and subsequent correct stimulus discrimination, providing  
168 direct evidence for aSWR-mediated strengthening of emotional memory. Interestingly, the  
169 higher aSWRs occurrence has been shown in rodents, after exposure to a novel or  
170 reward-associated context<sup>22</sup>. Together, this suggests that aSWRs may play a general role  
171 in the selective enhancement of salient experiences<sup>23</sup>.

172

173       Notably, such association is specific to the post-encoding period that starts  
174 immediately after memory encoding, when memory retrieval is essential to rate the  
175 emotional content of the stimuli. This finding supports theoretical assumptions that SWRs  
176 mediate both the retrieval of stored representation utilized in decision-making, and the  
177 strengthening of the same representation, contributing to memory consolidation<sup>22</sup>.

178

179       Next, we aimed to discern the link between the aSWR-associated interaction between  
180 the amygdala and hippocampus during post-encoding and subsequent memory effect.  
181 We found the aSWRs were accompanied by memory reinstatement during the post-  
182 encoding period. Specifically, the reinstatement in the amygdala appears shortly before  
183 the aSWR peak and shows association with arousing stimuli, while the hippocampal  
184 reinstatement appears around the aSWR peak and shows associations with correct  
185 subsequent memory discrimination. Moreover, the co-occurrence of the amygdala and  
186 the hippocampal reinstatement during the same post-encoding aSWR events - with the  
187 amygdala reinstatement leading hippocampal by ~100 msec - is predictive of subsequent  
188 correct memory discrimination. This finding suggests that the coordinated reinstatement  
189 in the amygdala and hippocampus during aSWR is responsible for combining emotional  
190 and contextual aspects of the memory<sup>20,21</sup>.

191

192       Both the joint-reinstatement and mutual information analyses further confirm the  
193 predictive validity of directional influence from the amygdala to the hippocampus before  
194 aSWRs on correct discrimination, establishing a link between the amygdala reinstatement  
195 and memory discrimination as a physiological mechanism of emotional memory  
196 enhancement. Together, our data support a model wherein the memory reinstatement in  
197 the amygdala, triggered by emotional stimuli, elicits amygdala-hippocampal aSWR-  
198 associated memory reinstatement, enabling the coordinated joint-reinstatement, which  
199 facilitates subsequent memory performance.

200

## 201 **Acknowledgement**

202       The authors thank all the participants for taking part in the study, as well as the  
203 nurses, technicians, and physicians at the UCI Epilepsy Unit. This work was supported by  
204 NIH Grant 1U19NS107609-01 to R.T.K. (subcontract to J.J.L).

205



206 **Competing Interests statement**

207 The authors declare no competing interest.

208

209 **References**

- 210 1. Cahill, L., Mcgaugh, J.L. & Cahill, L. **2236**, 22983–22986 (1998).
- 211 2. Kensinger, E.A. *Emot. Rev.* **1**, 99–113 (2009).
- 212 3. Szöllösi, Á. & Racsmány, M. *Mem. Cogn.* **48**, 1032–1045 (2020).
- 213 4. Talmi, D. *Curr. Dir. Psychol. Sci.* **22**, 430–436 (2013).
- 214 5. Yonelinas, A.P. & Ritchey, M. *Trends Cogn. Sci.* **19**, 259–267 (2015).
- 215 6. Ben-Yakov, A., Eshel, N. & Dudai, Y. *J. Exp. Psychol. Gen.* **142**, 1255–1263
- 216 (2013).
- 217 7. Sols, I., DuBrow, S., Davachi, L. & Fuentesmilla, L. *Curr. Biol.* **27**, 3499-3504.e4
- 218 (2017).
- 219 8. Logothetis, N.K. et al. *Nature* **491**, 547–553 (2012).
- 220 9. Skelin, I. et al. *Proc. Natl. Acad. Sci. U. S. A.* **118**, (2021).
- 221 10. Buzsáki, G. *Hippocampus* **25**, 1073–1188 (2015).
- 222 11. Wu, C.T., Haggerty, D., Kemere, C. & Ji, D. *Nat. Neurosci.* **20**, 571–580 (2017).
- 223 12. Jadhav, S.P., Kemere, C., German, P.W. & Frank, L.M. *Science (80-. )*. **336**,
- 224 1454–1458 (2012).
- 225 13. Leal, S.L., Tighe, S.K. & Yassa, M.A. *Neurobiol. Learn. Mem.* **111**, 41–48 (2014).
- 226 14. Zheng, J. et al. *Neuron* **102**, 887-898.e5 (2019).
- 227 15. McGaugh, J.L. *Annu. Rev. Psychol.* **66**, 1–24 (2015).
- 228 16. Bragin, A., Engel, J., Wilson, C.L., Fried, I. & Buzsáki, G. *Hippocampus* **9**, 137–142
- 229 (1999).
- 230 17. Genzel, L. et al. *Philos. Trans. R. Soc. B Biol. Sci.* **375**, 4–6 (2020).
- 231 18. Wixted, J.T. et al. *Proc. Natl. Acad. Sci. U. S. A.* **111**, 9621–9626 (2014).
- 232 19. Lopes-dos-Santos, V. et al. *Neuron* **100**, 940-952.e7 (2018).
- 233 20. Girardeau, G., Inema, I. & Buzsáki, G. *Nat. Neurosci.* **20**, 1634–1642 (2017).
- 234 21. Trouche, S., Pompili, M.N. & Girardeau, G. *Curr. Opin. Physiol.* **15**, 230–237
- 235 (2020).
- 236 22. Joo, H.R. & Frank, L.M. *Nat. Rev. Neurosci.* **19**, 744–757 (2018).
- 237 23. McGaugh, J.L. *Proc. Natl. Acad. Sci. U. S. A.* **110**, 10402–10407 (2013).



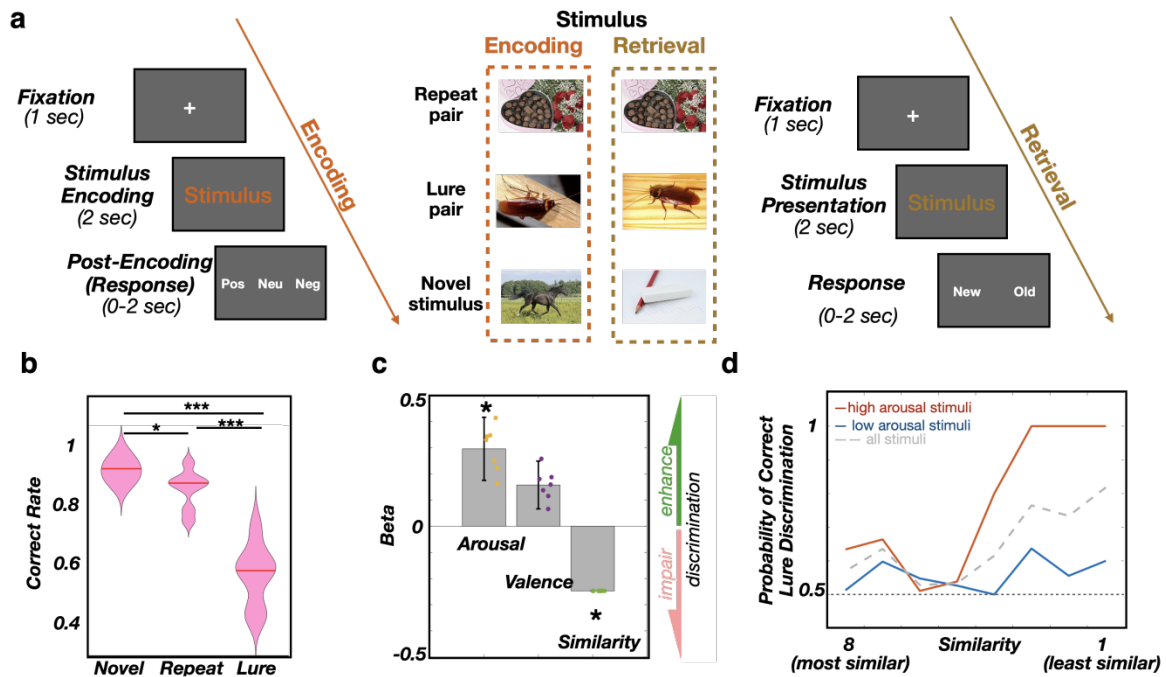

238

239

**Fig. 1. Memory discrimination is more accurate for emotional stimuli.**

240

**a**, Task structure: subjects are presented with an image (Stimulus encoding). Following presentation, they rate the valence of the image as negative, neutral, or positive (Post- Encoding/Response). Once all images are presented and rated, subjects are presented

241

with 3 types of stimuli - Repeat (identical), Lure (slightly different) or Novel (stimuli not seen during encoding) - and classify each stimulus as “old” or “new.”

242

**b**, Correct discrimination is highest for Novel stimuli ( $93.9 \pm 1.4$  %; median  $\pm$  SEM), followed by

243

Repeats ( $89.4 \pm 2.4$  %) and Lures ( $61.5 \pm 3.7$  %). Paired t-test: Novel vs. Repeat, \*p =

244

Repeats ( $89.4 \pm 2.4$  %) and Lures ( $61.5 \pm 3.7$  %). Paired t-test: Novel vs. Repeat, \*p =

245

0.016,  $t = 3.33$ ,  $df = 6$ ; Novel vs. Lure, \*\*\*p < 0.001,  $t = 8.36$ ,  $df = 6$ ; Repeat vs. Lure, \*\*\*p <

246

0.001,  $t = 6.13$ ,  $df = 6$ .

247

**c**, Correct discrimination of Lure stimuli is positively associated with encoded stimulus-induced arousal (\*p=0.047,  $\beta = 0.3 \pm 0.12$ ,  $t = 1.98$ ,  $df = 452$ ,

248

logistic linear mixed-effect model) and valence (p = 0.137,  $\beta = 0.15 \pm 0.09$ ,  $t = 1.48$ ,  $df =$

249

452), while negatively associated with similarity (\*p = 0.039,  $\beta = -0.24 \pm 0.00$ ,  $t = -2.06$ ,  $df =$

250

452). The  $\beta$  sign and magnitude indicate effect direction and strength, respectively.

251

Dots correspond to individual subjects.

252

**d**, Probability of Lure correct discrimination as a function of SI and stimulus-induced arousal. The solid line shows the actual proportion

253

of ‘New’ responses (y-axis) as a function of Lure stimulus SI (x-axis) for low arousal (blue)

254

or high arousal stimuli (red). The low/high arousal groups were created using the median

255

split.

256

split.

257

split.

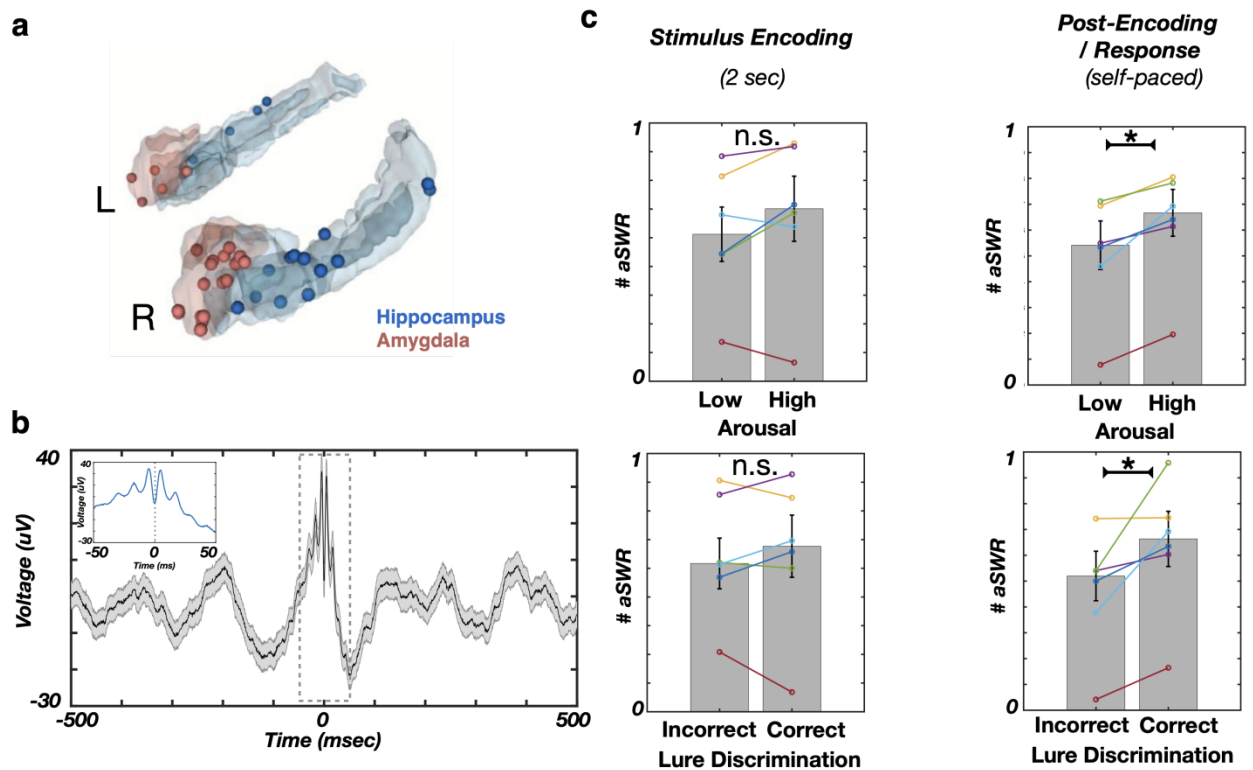

258

259 **Fig. 2. The post-encoding aSWR occurrence predicts the stimulus-induced arousal**  
260 **and memory discrimination.** a, Reconstructed locations of hippocampal (blue) and  
261 amygdala electrodes (red). b, The aSWR grand average waveform (n = 4689 aSWRs in 6  
262 hippocampal channels, 6 subjects). c, The aSWR occurrence is significantly higher  
263 following encoding of arousing (top right; \*p = 0.03) and later correctly discriminated  
264 stimuli (bottom right, \*p = 0.03). The aSWR occurrence was showing no conditional  
265 differences during stimulus encoding (left column, p's > 0.05).

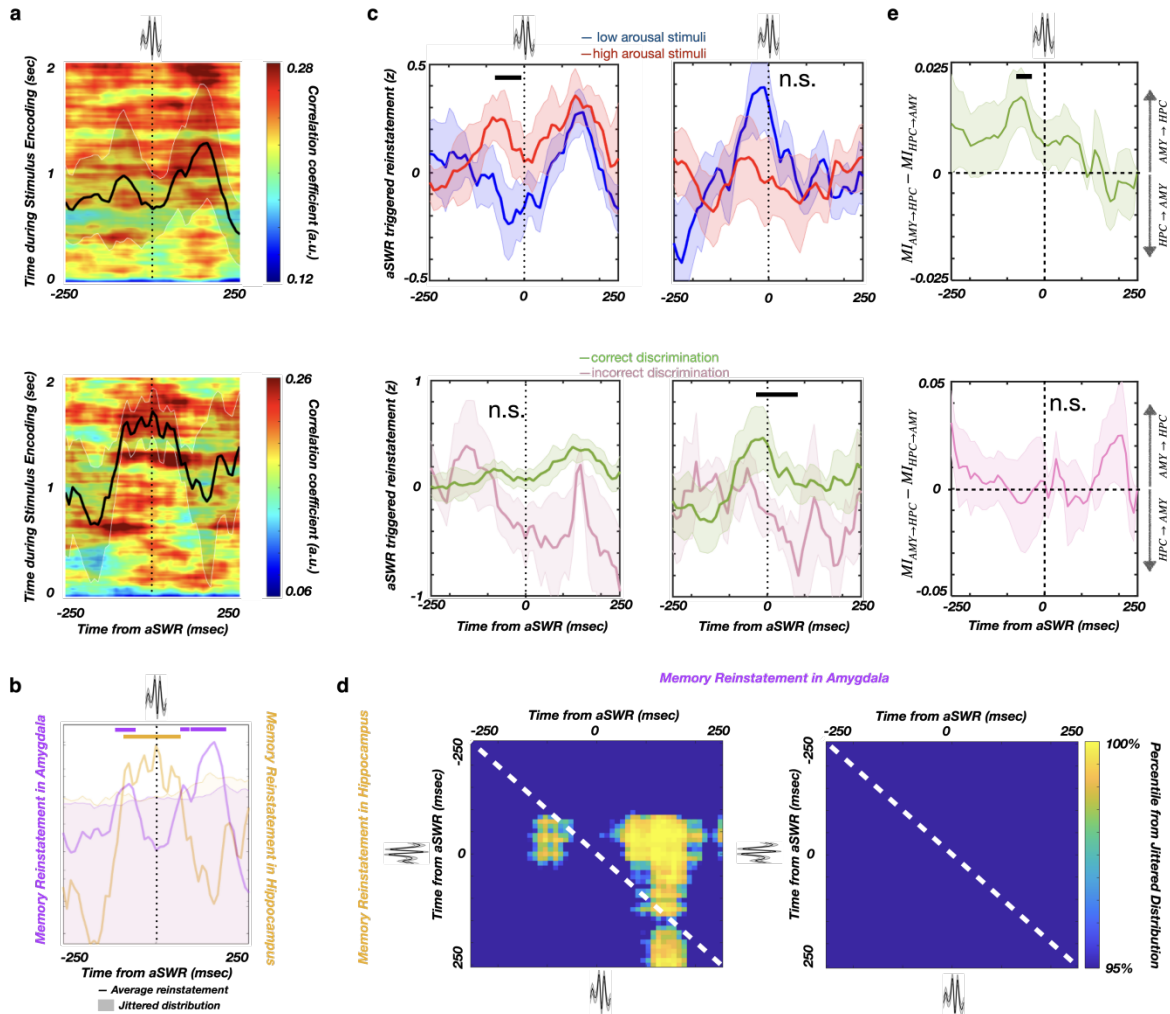

266

267 **Fig. 3. Memory reinstatement in the hippocampus and amygdala around aSWR. a,**

268 aSWR-locked reinstatement in the amygdala (top) and hippocampus (bottom) during the

269 post-encoding period (line and shaded areas represent the mean  $\pm$  SEM). **b,**

270 Reinstatement is greatest around the time of aSWRs as shown by comparison with the

271 null-distribution (within  $\pm$  250 msec). Shaded areas denote the null-distribution 95%

272 confidence interval. Reinstatement in the hippocampus overlaps with aSWR peak

273 (orange), while reinstatement in the amygdala peaks prior to and after the aSWR

274 (magenta). **c,** aSWR-locked reinstatement in the amygdala is stronger for arousing stimuli

275 (top left,  $p = 0.035$ , see Methods) but is not associated with subsequent discrimination

276 (bottom left,  $p = 0.066$ ). Reinstatement in the hippocampus is robust for correctly

277 discriminated stimuli (bottom right,  $p = 0.008$ , see Methods) but does not depend on

278 stimulus-induced arousal (top right,  $p > 0.1$ ). **d,** The aSWR-locked joint reinstatement in

279 the hippocampus and amygdala for the correct (left) and incorrect (right) discrimination

280 trials. Reinstatement in the amygdala starts 100 msec prior to the aSWR peak, followed  
281 by reinstatement in the hippocampus (-50 to 200 msec). There is no significant joint  
282 reinstatement during incorrect discrimination trials, suggesting that the cross-structure  
283 joint reinstatement may be required for correct discrimination. **e**, Mutual information (MI)  
284 difference for the amygdala (AMY) and hippocampal (HPC) memory reinstatement time-  
285 courses, during the post-encoding aSWR windows (correct discrimination - top, incorrect  
286 discrimination - bottom). Positive values denote stronger AMY→HPC directionality. A  
287 temporal cluster of significant MI difference (AMY→HPC) is present before aSWR peak  
288 time(-70 to -30 msec) after encoding of correctly discriminated stimuli (top;  $p = 0.038$ , see  
289 Methods), indicating that hippocampal reinstatement is better predictable by amygdala  
290 reinstatement than vice versa. This effect is present only during the post-encoding period  
291 for correctly discriminated stimuli (top), but not for the incorrectly discriminated stimuli

292 **Extended data**

293

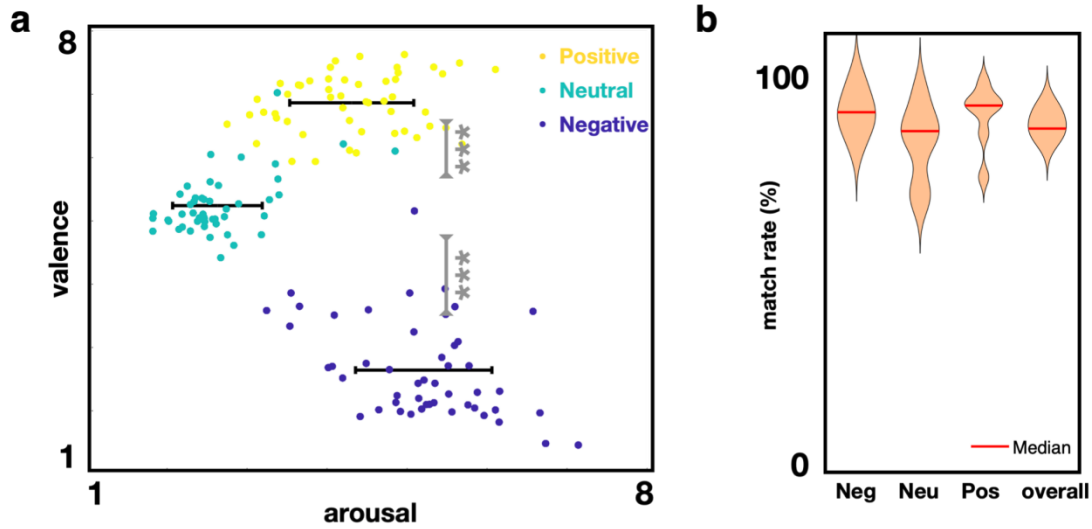

294

295

296 **Extended Data Fig. 1. a**, Positive and negative valenced stimuli are associated with  
297 higher stimulus-induced arousal, relative to neutral valence stimuli (\*\* $p < 0.001$ , Wilcoxon  
298 rank-sum test). **b**, Stimuli valence ratings of study subjects are highly similar to the  
299 healthy population (match rate =  $85.3 \pm 1.3\%$ ).

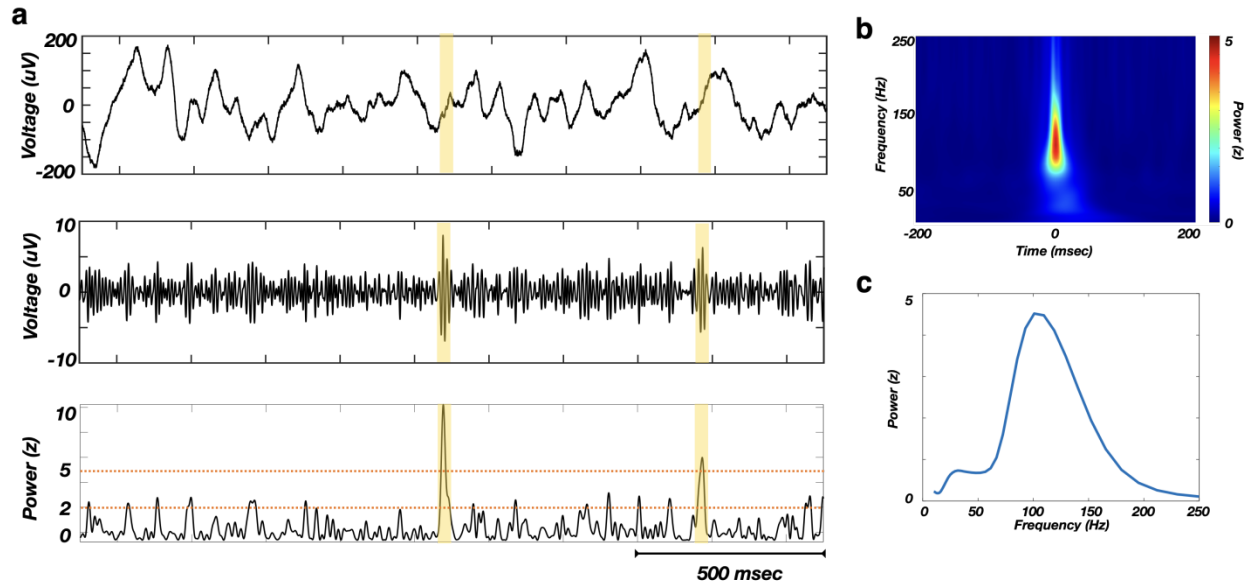

300

301 **Extended Data Fig. 2. Awake SWR detection.** a, Examples of several detected aSWRs  
302 (yellow highlights), showing the raw trace (top), filtered trace (80 - 150 Hz range, middle)  
303 and z-scored envelope of filtered trace (bottom). Detection is based on double-threshold  
304 (orange dashed lines) crossing of z-scored power (80-150 Hz) for the period of 20-100  
305 msec. b, Z-scored power spectral density of average detected aSWR. c, Z-scored power  
306 during aSWR windows shows a bump in the 80-150 Hz range. This suggests that the  
307 aSWRs are not detected during signal artifact periods, which would reflect as a  
308 broadband power increase. In addition, detected aSWRs are not detected during non-  
309 specific increase in broadband gamma power or pathological high-frequency oscillations  
310 (> 200 Hz).

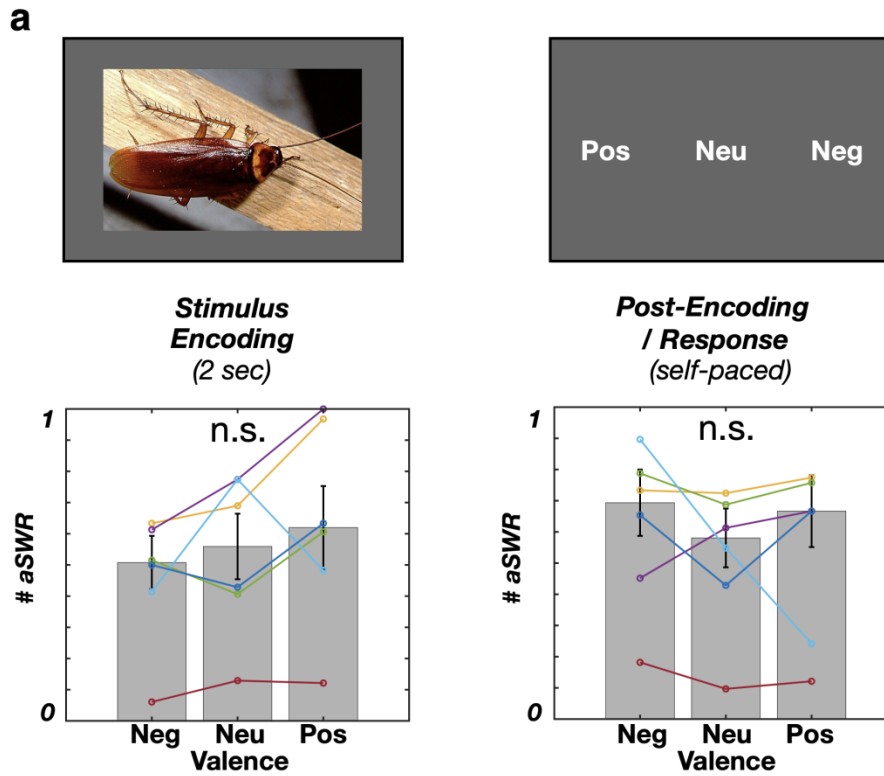

311

312 **Extended Data Fig. 3. Stimulus valence is not significantly associated with aSWR**  
313 **occurrence during encoding stage.** a, Stimulus encoding phase:  $F(2, 15) = 0.67$ ,  $p =$   
314  $0.53$ ; Post-encoding:  $F(2, 15) = 0.25$ ,  $p = 0.77$ , One-way ANOVA). The data from  
315 individual subjects are color-coded.



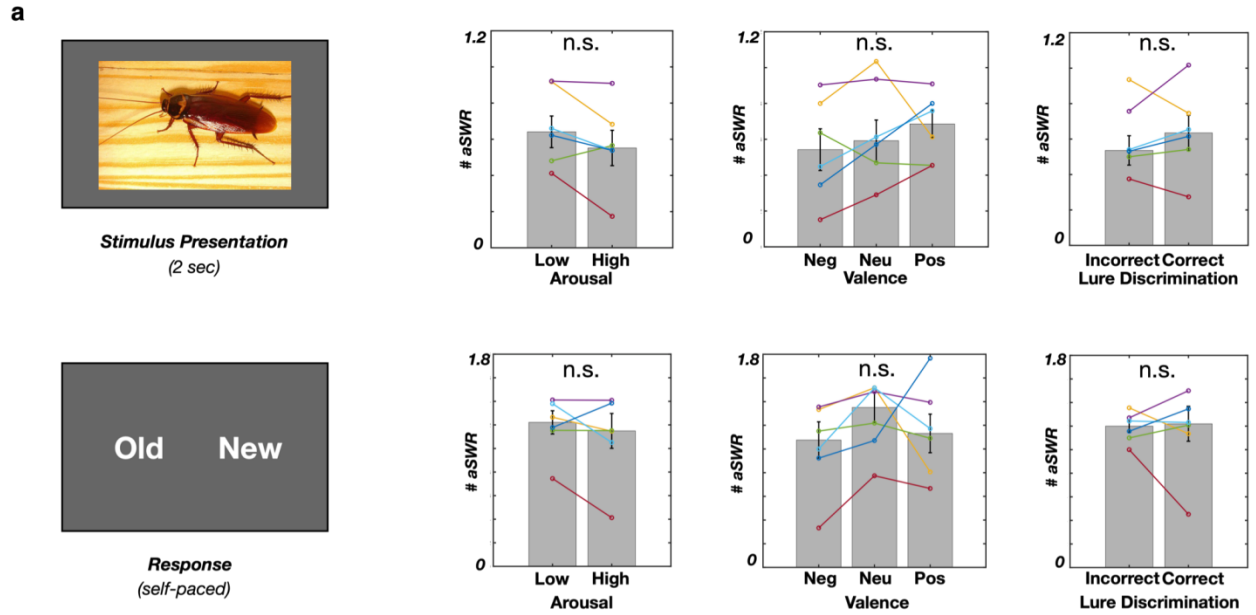

316

317 **Extended Data Fig. 4. The aSWR occurrence during retrieval task stage is not**  
 318 **associated with stimulus-induced arousal, valence or correct discrimination.**

319 **Arousal:** Stimulus presentation (top row),  $p = 0.11$ ,  $z = 1.57$ ; Response (bottom row),  $p =$   
 320  $0.17$ ,  $z = 1.36$ , Wilcoxon signed-rank test. **Valence:** Stimulus presentation,  $p = 0.69$ ,  $F(2,$   
 321  $15) = 0.69$ ; Response,  $p = 0.51$ ,  $F(2, 15) = 0.71$ , One-way ANOVA). **Correct**  
 322 **discrimination:** Stimulus presentation:  $p = 0.6$ ,  $z = -0.52$ ; Response:  $p = 0.92$ ,  $z = 0.11$ ,  
 323 Wilcoxon signed-rank test).

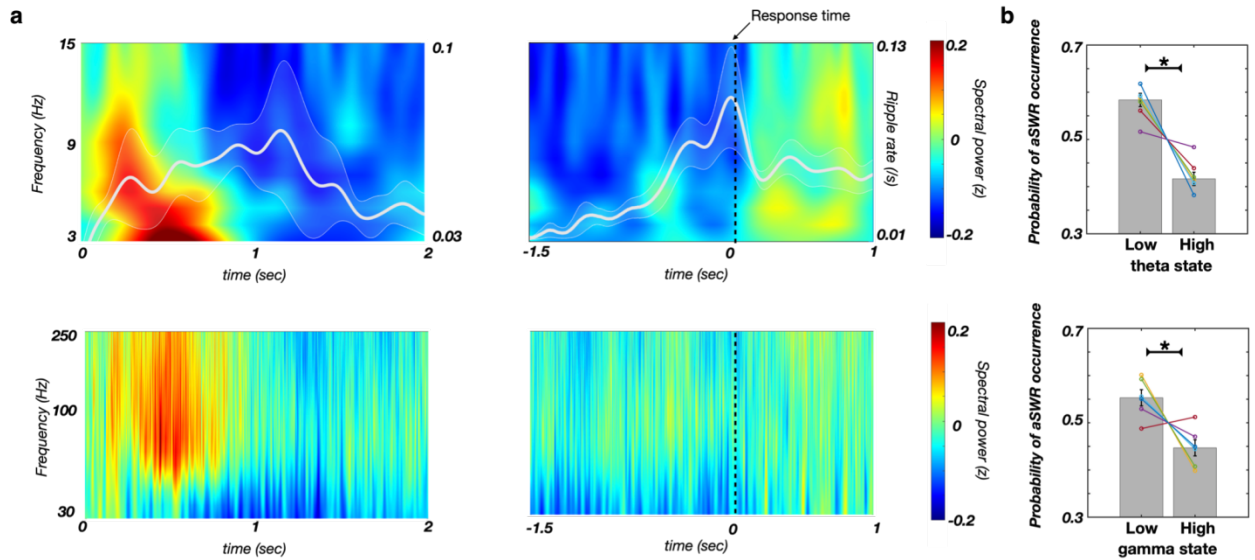

324

325 **Extended Data Fig. 5. aSWRs occur predominately outside of high theta or**  
326 **broadband gamma periods. a**, Low frequency (top, color) and high frequency  
327 spectrogram (bottom, color), and aSWR rate (white line) during the stimulus encoding  
328 (left) and post-encoding (right, response-locked) periods. **b**, The probability of aSWR  
329 occurrence is lower during the high theta state (top,  $p = 0.017$ ,  $z = 2.1$ , one-tailed  
330 Wilcoxon signed-rank test), or during high gamma state (bottom,  $p = 0.028$ ,  $z = 1.9$ , one-  
331 tailed Wilcoxon signed-rank test). Theta/gamma state classification was based on the  
332 power median split (for details, see 'Dual state analysis').

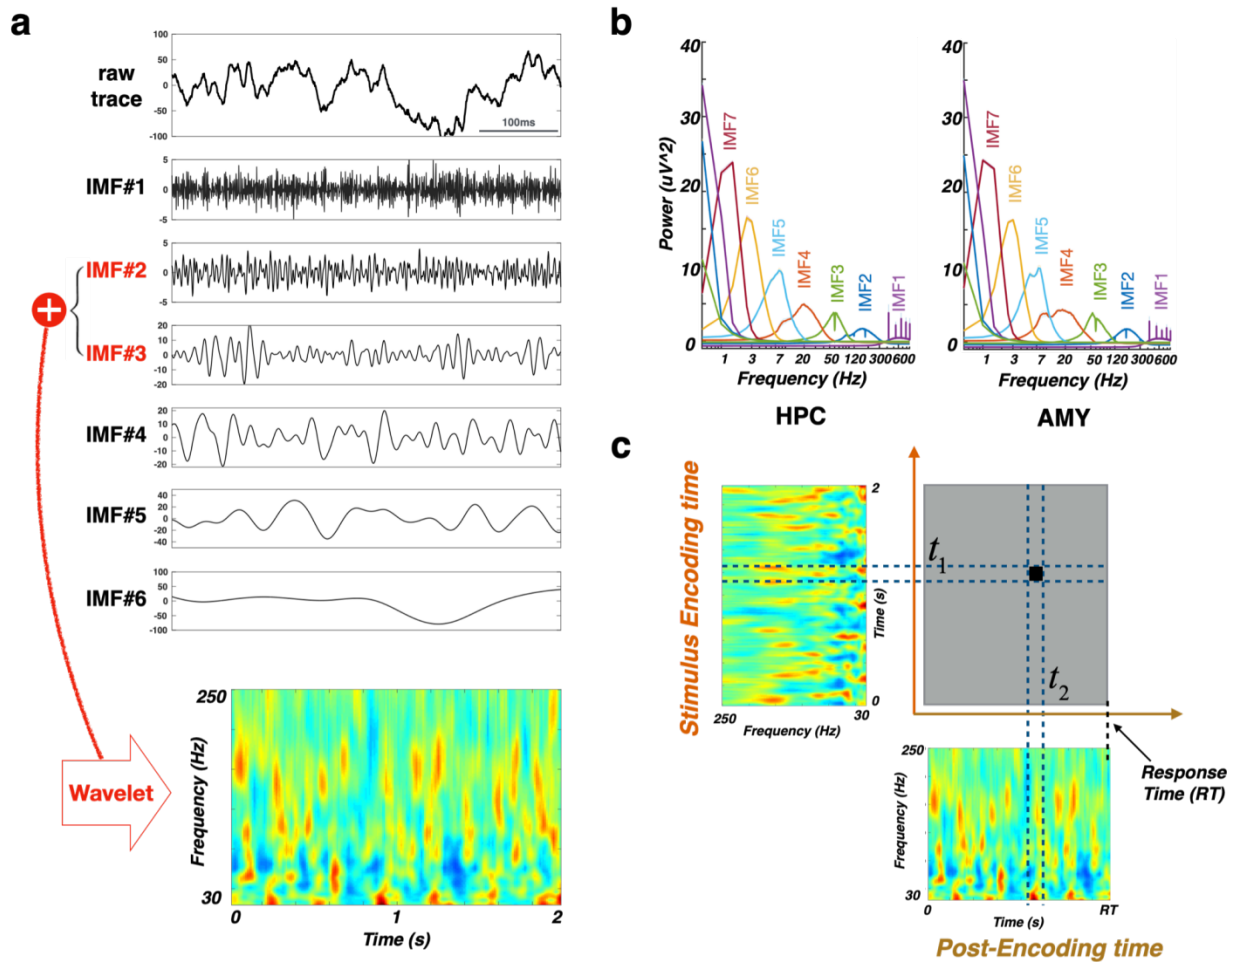

333

334 **Extended Data Fig. 6. Overview of Ensemble Empirical Mode Decomposition**

335 **(EEMD) and representational similarity analysis (RSA) methods.** **a**, An example

336 hippocampal raw iEEG trace (top) was decomposed into multiple intrinsic mode functions

337 (IMFs; lower 6 panels). IMFs within the HFA range (IMF<sub>2</sub> and IMF<sub>3</sub>) were used for HFA

338 reconstruction. The HFA time-frequency matrix (bottom) was estimated using wavelet

339 transformation (for details, see Time-frequency representation of the HFA). **b**, Power

340 spectral density (mean  $\pm$  SEM) of the IMFs decomposed from the hippocampal (left) and

341 amygdala (right) electrodes. IMF spectral features were consistent across subjects and

342 structures, with mean center frequencies in delta (IMF<sub>7</sub>), theta (IMF<sub>6</sub>, IMF<sub>5</sub>), alpha/beta

343 (IMF<sub>4</sub>), gamma (IMF<sub>3</sub>), high-gamma bands (IMF<sub>2</sub>), and the noise term (IMF<sub>1</sub>). The HFA

344 time series were estimated by summing the IMFs with center frequencies  $>$  30 Hz (IMF<sub>2</sub>

345 and IMF<sub>3</sub>). **c**, The similarity matrix (top right) was constructed by computing the power

346 spectrum vector (PSV) Spearman's correlations for each combination of stimulus

347 encoding (top left) and post-encoding (bottom right) time bins.

348

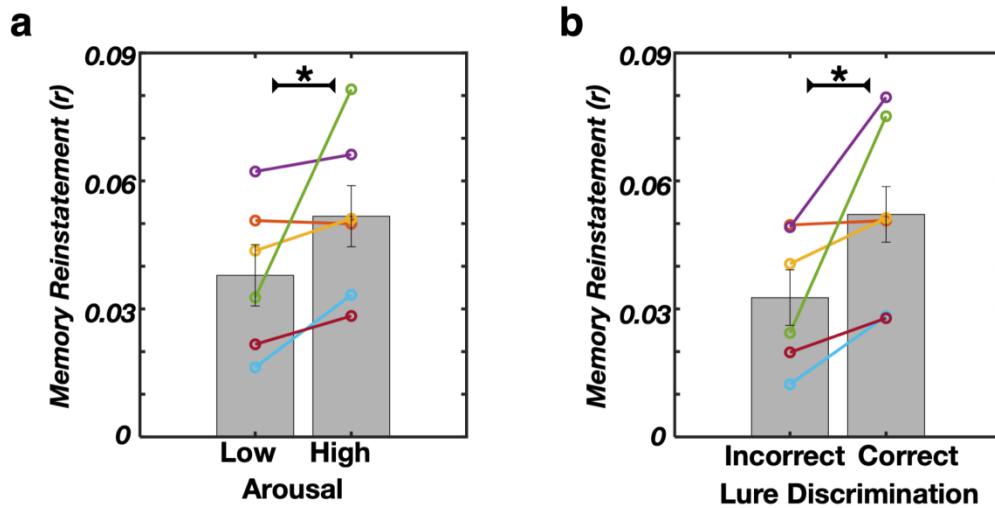

349

350 **Extended Data Fig. 7. Post-encoding aSWR-locked reinstatement (amygdala and**  
351 **hippocampus combined) is increased for high stimulus-induced arousal and**  
352 **correctly discriminated stimuli. a, Arousal: \* $p = 0.046$ ,  $z = -1.991$ , Wilcoxon signed-**  
353 **rank test. b, Correct discrimination: \* $p = 0.028$ ,  $z = -2.201$ , Wilcoxon signed-**  
354 **rank test). Data from individual subjects is color-coded.**

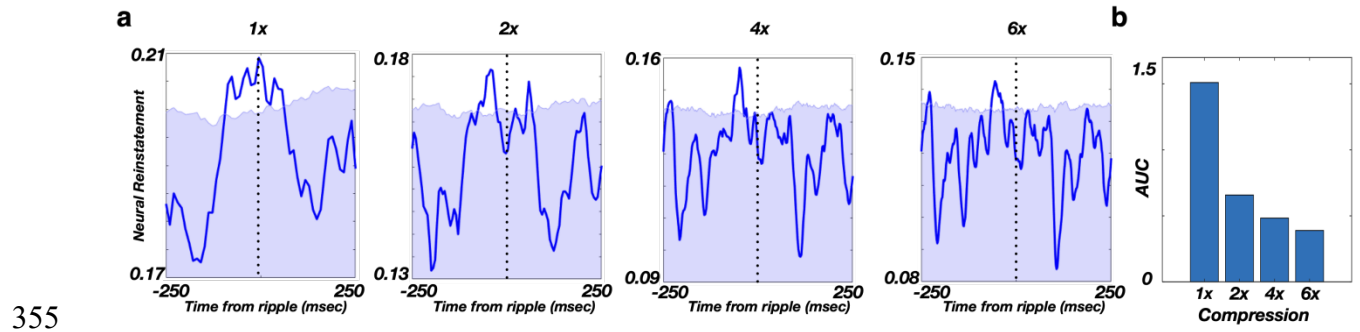

356 **Extended Data Fig. 8. Post-encoding aSWR-locked memory reinstatement in the**  
357 **hippocampus is strongest without time compression. a,** aSWR-locked hippocampal  
358 reinstatement during the post-encoding response period, across different temporal  
359 compression factors. Memory reinstatement strength area under curve (AUC) is defined  
360 as enclosed by the reinstatement trace (blue line) and 95% percentile of empirical null-  
361 distribution (blue shading upper limit). AUC reflects the memory reinstatement strength at  
362 different compression factors. **b,** Memory reinstatement strength is highest with no  
363 compression.

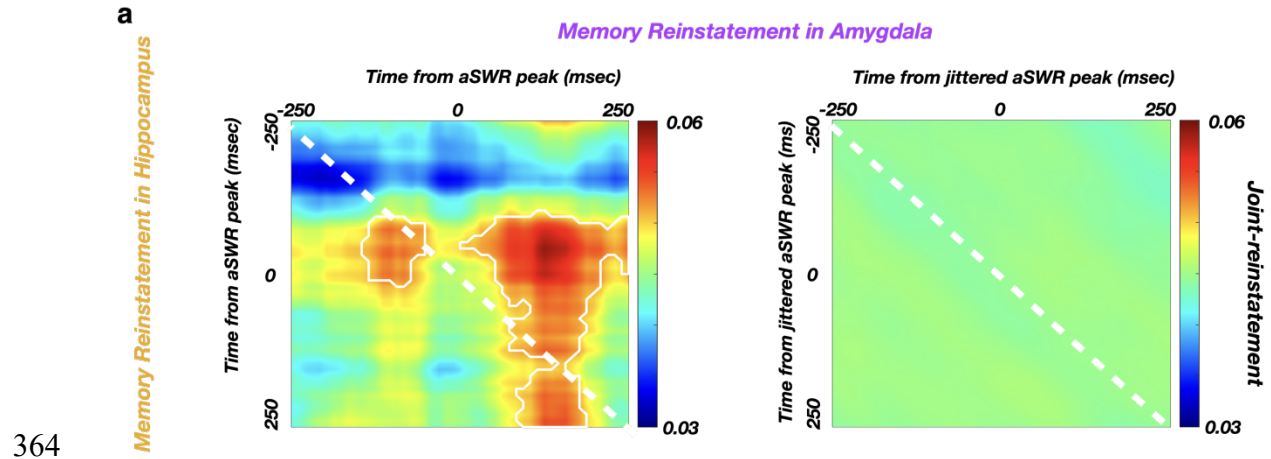

365 **Extended Data Fig. 9. Joint cross-structure memory reinstatement occurs**  
366 **selectively during aSWR time windows. a,** Average joint cross-structure reinstatement  
367 (hippocampus and amygdala) relative to aSWR peak times (left) and relative to jittered  
368 aSWR peak times (right). The white line encircles the periods of significant joint cross-  
369 structure memory reinstatement (Fig. 3d). The color scale represents the Spearman  
370 correlation between the encoding stimulus presentation and post-encoding aSWR  
371 windows. The absence of significant joint cross-structure memory reinstatement following  
372 the jittering of aSWR peak times (right) reveals the specificity of cross-structure  
373 reinstatement to aSWR windows.

| <b>Subject</b> | <b>Gender</b> | <b>Age</b> |
|----------------|---------------|------------|
| <b>S1</b>      | <b>M</b>      | <b>21</b>  |
| <b>S2</b>      | <b>F</b>      | <b>58</b>  |
| <b>S3</b>      | <b>M</b>      | <b>24</b>  |
| <b>S4</b>      | <b>F</b>      | <b>55</b>  |
| <b>S5</b>      | <b>M</b>      | <b>23</b>  |
| <b>S6</b>      | <b>M</b>      | <b>29</b>  |
| <b>S7</b>      | <b>F</b>      | <b>21</b>  |

374

375 Extended Data Table 1. Demographic information for the study subjects.



|               | <b>Hippocampus</b> | <b>Amygdala</b> |
|---------------|--------------------|-----------------|
| <b>IMF#1</b>  | 420 Hz             | 420 Hz          |
| <b>IMF#2</b>  | 159 Hz             | 184 Hz          |
| <b>IMF#3</b>  | 57.5 Hz            | 53 Hz           |
| <b>IMF#4</b>  | 20 Hz              | 18 Hz           |
| <b>IMF#5</b>  | 8 Hz               | 7.5 Hz          |
| <b>IMF#6</b>  | 2.5 Hz             | 3 Hz            |
| <b>IMF#7</b>  | 1.5 Hz             | 1 Hz            |
| <b>IMF#8</b>  | 0.5 Hz             | 0.5 Hz          |
| <b>IMF#9</b>  | < 0.5 Hz           | < 0.5 Hz        |
| <b>IMF#10</b> | < 0.5 Hz           | < 0.5 Hz        |

376

377 Extended Data Table 2. Center frequencies of the IMFs in the hippocampus and  
378 amygdala.

379 **Methods**

380 **Subjects**

381 Intracranial electroencephalography (iEEG) recordings were obtained from 7  
382 subjects (3 females; mean age  $\pm$  SD = 33  $\pm$  16), undergoing presurgical monitoring of  
383 epileptic foci at the University of California Irvine Medical Center (UCIMC) Epilepsy  
384 Monitoring Unit. The individual subject demographic information is shown in Table 1. Only  
385 the subjects with the correct discrimination rate of Novel trials  $\geq$  85% (see Emotional  
386 memory encoding and discrimination task) were included in the analysis. Electrode  
387 placements were determined entirely based on clinical considerations. All the research  
388 procedures were approved by the UCI Institutional Review Board and data was collected  
389 following informed consent.

390

391 **Statistics**

392 All the statistical tests were performed with the individual subject as the unit of  
393 analysis. Unless stated otherwise, all the parametric statistical tests (e.g., Wilcoxon  
394 signed-rank test, t-test) were two-tailed. The effects of valence, stimulus-induced arousal  
395 and similarity on stimulus discrimination (Fig. 1c) were assessed using the logistic linear  
396 mixed-effect model (for details, see Behavioral Analysis). Conditional comparisons of  
397 aSWR occurrence (correct/incorrect discrimination or high/low arousal; Fig. 2c) were  
398 done using the Wilcoxon signed rank test ( $p < 0.05$ ). Statistical significance of aSWR-  
399 locked memory reinstatement strength (Fig. 3b) was assessed by comparing the real test  
400 statistics with empirical null distribution, obtained using Monte Carlo method (for details,  
401 see Representational Similarity Analysis). We implemented the cluster-based  
402 nonparametric permutation test<sup>1</sup> to assess the conditional differences (correct/incorrect  
403 discrimination or high/low arousal) of memory reinstatement strength (Fig. 3c), mutual  
404 information (Fig. 3e), by randomly shuffling the conditional trial labels 1000 times (for  
405 details, see Representational Similarity Analysis). Similarly, the significant temporal  
406 windows for the cross structure aSWR-locked joint memory reinstatement (Fig. 3d) were  
407 assessed by comparing to empirical null distribution (for details, see Joint-reinstatement  
408 Analysis).

409

410 **Emotional memory encoding and discrimination task**

411 The emotional memory encoding and discrimination (EMOP) task consists of  
412 encoding and discrimination blocks. During the encoding block (148 trials), each trial

413 consists of a cross fixation (1000 msec), followed by stimulus encoding (2000 msec) and  
414 self-paced post-encoding response period (up to 2000 msec). During the post-encoding  
415 response period, subjects are asked to classify the stimulus emotional valence as either  
416 negative, neutral or positive, using the corresponding laptop key. During the retrieval  
417 block (290 trials), trial time structure is identical to encoding phase. Following the cross  
418 fixation (1000 msec), the subjects are presented for 2000 msec with a stimulus identical  
419 (Repeat, 54 trials), slightly different (Lure, 97 trials) or unrelated (Novel, 139 trials) to  
420 previously encoded stimuli. Next, during the self-paced memory discrimination epoch (up  
421 to 2000 msec), subjects are asked to discriminate if the presented stimulus was seen  
422 during encoding (Old) or not (New). Correct discrimination is defined as classifying the  
423 Repeat stimuli as Old and Lure or Novel stimuli as New. The stimuli were selected from  
424 the continuous distributions across the valence and stimulus-induced arousal axes  
425 (Extended Data Fig. 1). The same set of stimuli was used across subjects. In addition,  
426 the valence, arousal and similarity of each stimulus were rated by separate cohorts of  
427 healthy subjects. Specifically, a first cohort ( $N = 50$ , 32 females; age mean  $\pm$  SD =  $22 \pm 5$ )  
428 rated the stimulus emotional valence on a continuous scale (range 1-9, with 1 denoting  
429 the most negative, 9 the most positive, and 5 neutral valence). Stimuli were assigned in  
430 Negative (valence  $\leq 3.5$ ), Neutral ( $3.5 < \text{valence} < 6$ ) or Positive (valence  $\geq 6$ ) groups.  
431 Another cohort of healthy subjects ( $N = 16$ , 4 females; age mean  $\pm$  SD =  $23 \pm 5$ ) rated the  
432 stimulus-induced emotional arousal on a scale 1 - 9 (1 being the least and 9 being the  
433 most arousing). Finally, a third cohort ( $N = 17$ , 11 females; age mean  $\pm$  SD =  $20 \pm 1$ )  
434 examined relative similarity on the scale 1-8<sup>2</sup>. The high correspondence of stimulus  
435 valence ratings obtained from study subjects and healthy population (match rate =  $85.3 \pm$   
436 1.3%) suggests the intact emotional processing in study subjects (Extended Data Fig. 1).

437

### 438 **Behavioral Analyses**

439 To assess the effects of valence, stimulus-induced arousal and similarity on Lure  
440 stimulus discrimination, we implemented the logistic linear mixed-effect model

$$441 \quad y = \beta X + uZ + \varepsilon.$$

442 In this model,  $y$  indicates the responses across the individual Lure discrimination trials (0-  
443 Old; 1-New),  $X = [x_1, x_2, x_3]^T$  denotes three fixed effect regressors (encoded stimulus  
444 valence and arousal as well as similarity between the encoded and Lure stimulus),  $Z =$   
445  $[z_1]^T$  denotes random effect regressor (subject identity),  $\beta$  and  $u$  denote the fixed and  
446 random-effect regression coefficients, and  $\varepsilon$  denotes the error term. The model includes

447 random intercept to incorporate individual subject differences. We normalized the  
448 valence, stimulus-induced arousal and similarity values relative to the scale of 0 to 1. The  
449 statistics reported in Fig. 1c corresponds to the fixed-effect coefficients  $\beta$ .

450

#### 451 **Data collection**

452 The behavioral experiment was administered using the PsychoPy2 software<sup>3</sup> (Version  
453 1.82.01). The laptop was placed at a comfortable distance in front of the subject. The  
454 iEEG signal was recorded using a Nihon Kohen system (256 channel amplifier, model  
455 JE120A), with an analog high-pass filter (0.01 Hz cutoff frequency) and sampling  
456 frequency 5000 Hz.

457

#### 458 **Electrode localization**

459 We localized each electrode using pre-implantation structural T1-weighted MRI  
460 scans (pre-MRI) and post-implantation MRI scans (post-MRI) or CT scans (post-CT).  
461 Specifically, we co-registered pre-MRI and post-MRI (or post-CT) scans by means of a  
462 rigid body transformation parametrized with three translation in x,y,z directions as well as  
463 three rotations using Advanced Normalization Tools (ANTs  
464 <https://stnava.github.io/ANTs/>). We implemented a high-resolution anatomical template  
465 with the label of medial temporal lobe subfields<sup>2</sup> to guide the localization for individual  
466 electrodes. We resampled the template with 1mm isotropic, and aligned it to pre-MRI by  
467 ANTs Symmetric Normalization<sup>4</sup> to produce a subject-specific template. The electrode  
468 localization was identified by comparing the subject-specific template subfield area with  
469 electrode artifacts.(Fig. 2a) The localization results were further reviewed by the  
470 neurologist (J.J.L.).

471

#### 472 **Preprocessing**

473 The signal preprocessing was done using the custom-written MATLAB code (Version  
474 9.7) and Fieldtrip Toolbox<sup>5</sup>. The 60 Hz line noise and its harmonics were removed using a  
475 finite impulse response (FIR) notch filter (ft\_preprocessing.m function in FieldTrip). The  
476 EEG signal was down-sampled to 2000 Hz, demeaned and high-passed filtered (cutoff  
477 frequency 0.3 Hz). The power spectrum density (PSD) was computed using the  
478 multitaper method with the Hanning window (ft\_freqanalysis.m function in FieldTrip). All  
479 the channels were re-referenced to the nearest white matter channel from the same  
480 depth electrode, based on the electrode localization results. The interictal epileptic

481 discharges were manually marked by an epileptologist (J.J.L.), using the  
482 `ft_databrowser.m` function in FieldTrip. The channels with severe contamination and trials  
483 containing epileptiform discharges were excluded from further analyses.

484

#### 485 **Awake sharp-wave/ripple detection**

486 Following the removal of channels with excessive epileptic activity and individual  
487 trials containing visually identified interictal epileptic discharges, awake sharp-  
488 wave/ripples (aSWRs) were detected on the remaining hippocampal channels, using the  
489 Freely Moving Animal Toolbox (FMA; <http://fmatoolbox.sourceforge.net/>). First, the iEEG  
490 traces from the trials used in the analysis were concatenated. Next, concatenated traces  
491 were bandpass-filtered (80 - 150 Hz, Chebyshev 4th order filter, function `fitfilt.m` in  
492 Matlab) and the voltage values during periods  $\pm 75$  msec around the trial onsets/offsets  
493 were set to zero, to avoid the edge effects resulting from filtering discontinuous traces.  
494 The analytical amplitude was obtained by computing the absolute value of Hilbert-  
495 transformed filtered trace (function `hilbert.m` in Matlab) and z-scored (Extended Data Fig.  
496 2a). Detected events were considered aSWRs if the z-scored analytical amplitude  
497 remained above the lower threshold ( $z = 2$ ) for 20 - 100 msec and if the peak value during  
498 this period exceeded higher threshold ( $z = 5$ ). Only the channels with  $>150$  detected  
499 aSWR events were used in the analysis. If the multiple channels from a single subject  
500 passed this criteria, a channel with highest number of detected aSWRs was selected for  
501 further aSWR-related analysis. Due to the low number of detected aSWRs, one subject  
502 was eliminated from the aSWR-related analysis.

503

#### 504 **Unsupervised decomposition of iEEG signal**

505 To assess the memory reinstatement, high-frequency activity (HFA; 30-280 Hz)  
506 was used as an indirect measure of local populational activity<sup>6-9</sup>. To avoid the effect of  
507 low-frequency harmonics on the HFA estimate, we applied the Ensemble Empirical Mode  
508 Decomposition<sup>7,10</sup> (EEMD; <https://github.com/leeneil/eemd-matlab.git>). Briefly, the EEMD  
509 decomposes a non-stationary signal into its elementary components, referred to as  
510 intrinsic mode functions<sup>10</sup> (IMFs; Extended Data Fig. 6). The procedure iteratively applies  
511 an empirical mode decomposition algorithm, while adding white noise to prevent the  
512 mode mixing<sup>10,11</sup>. Using this approach, decomposition output entirely depends on the  
513 signal's intrinsic properties, avoiding prior assumptions<sup>7,10,11</sup>. The resulting IMFs captured  
514 several canonical spectral features consistently across subjects and anatomical

515 structures (Extended Data Table 2). Finally, the HFA time-series on individual channels  
516 were reconstructed by summing the channel-specific IMFs with center frequencies > 30  
517 Hz<sup>7</sup>.

518

### 519 **Time-frequency representation of the HFA**

520 The instantaneous spectral power at each time-frequency bin was derived from the  
521 reconstructed HFA time series ( $x$ ), using a wavelet transform<sup>12,13</sup>. This approach consists  
522 of convolving the time series  $x$  with a set of Morlet wavelets, parametrized by a range of  
523 cycle numbers ( $n = 2, 3, \dots, 10$ ) at a given frequency  $f$ ,

524

$$525 \quad P_{f,n}(t) = |\psi_{f,n} * x(t)|, n = 2, 3, \dots, 10$$

526

527 with  $\psi_{f,n}$  defined as

528

$$529 \quad \psi_{f,n} = \frac{1}{B_n \sqrt{2\pi}} e^{-\frac{t^2}{2B_n^2}} e^{j2\pi f t}, \text{ where } B_n = \frac{n}{5f}$$

530

531 and computing the geometric average ( $\widehat{P}(f, t)$ ) of resulting spectral power at each time-  
532 frequency bin:

533

$$534 \quad \widehat{P}(f, t) = \sqrt[9]{\prod_{n=2}^{10} P_{f,n}(t)} .$$

535

536 This approach results in a high temporal and frequency resolution, facilitating the  
537 detection of narrow-band, transient oscillatory events<sup>12,13</sup>. The wavelet center frequencies  
538 were within 30 - 280 Hz range, with 1 Hz increments. The wavelet cycle number range (2-  
539 10) is commonly used<sup>14</sup>. To avoid the edge effects, this procedure was applied on the  
540 entire individual recording sessions, and the resulting time-frequency response matrices  
541 were segmented into trial epochs (starting -1000 msec prior to stimulus onset and ending  
542 1000 msec after the response time). The power within each trial epoch was then  
543 normalized by z-transforming each frequency bin and subtracting the average pre-trial  
544 baseline (-1000 - 0 msec, relative to stimulus onset<sup>14</sup>).

545

### 546 **Representational Similarity Analysis (RSA)**

547 The representational similarity was quantified as the Spearman correlation between  
548 the HFA power spectral vectors (PSVs), for each combination of the encoding-response

549 time bins from the same trial<sup>15-18</sup> (Extended Data Fig. 6). Specifically, the instantaneous  
550 spectral power at each frequency was estimated for 100 msec time bins (10 msec step  
551 size, 90% overlap), producing the time bin - specific power spectrum vectors (PSV),  
552 spanning the encoding (2 sec time window after stimulus onset) and post-encoding  
553 response (time window after stimulus offset and before button press) periods:

554

$$555 \quad \overrightarrow{PSV}_{encoding}(t_1) = [z_1(t_1), \dots, z_{n_f}(t_1)]_{encoding}$$

556

$$557 \quad \overrightarrow{PSV}_{response}(t_2) = [z_1(t_2), \dots, z_{n_f}(t_2)]_{response}$$

558

559 Similar to previous studies<sup>15-20</sup>, we computed Spearman's correlation as a measure of  
560 PSV similarity between the encoding time  $t_1$  and response time  $t_2$  for each encoded  
561 stimulus,

562

$$563 \quad r(t_1, t_2) = \frac{Cov\left(rg_{\overrightarrow{PSV}_{encoding}(t_1)}, rg_{\overrightarrow{PSV}_{response}(t_2)}\right)}{\sigma_{rg_{\overrightarrow{PSV}_{encoding}(t_1)}} \sigma_{rg_{\overrightarrow{PSV}_{response}(t_2)}}}, t_1 \in [0, 2], t_2 \in [0, RT] \text{ sec}$$

564

565 , with  $rg$  representing the ranking operator on the vector  $\overrightarrow{PSV}$ , and  $\sigma$  the variance of the  
566 vector. This produced a trial-specific two-dimensional similarity matrices, containing all  
567 the combinations of encoding ( $t_1$ ) and response ( $t_2$ ) time bins (Extended Data Figure 6d).  
568 The correlation coefficients  $r$  were then Fisher transformed, with the resulting  
569 coefficients following Gaussian distribution. The region-specific (amygdala and  
570 hippocampus) similarity matrices were averaged across trials within individual subjects,  
571 and used for group-level statistical analysis.

572

### 573 **aSWR-locked memory reinstatement**

574 Memory reinstatement during individual post-encoding time bins was computed by  
575 averaging the bin-specific similarity with the encoding period (200 time bins over 2 sec),  
576 resulting in a memory reinstatement time series. To obtain the aSWR-locked memory  
577 reinstatement, we averaged the memory reinstatement within  $\pm 250$  msec around the  
578 individual aSWR peak times, separately for amygdala and hippocampus (Fig. 3a). We  
579 next tested whether the memory reinstatement is locked to aSWRs (Fig. 3b), by  
580 comparing the grand-average aSWR-locked reinstatement trace with an empirical null  
581 distribution obtained from Monte Carlo simulation. Specifically, we circularly randomly



582 jittered the aSWR peak times within  $\pm 500$  msec window for 1000 times, obtaining an  
583 empirical null distribution of memory reinstatement strength.

584

585 To test whether the aSWR-locked reinstatement is associated with stimulus-induced  
586 arousal and later discrimination (Fig. 3c), we first derived the aSWR-triggered  
587 reinstatement, a metric taking the time-locked specificity relative to aSWR peak time into  
588 account. For every per-aSWR reinstatement trace around aSWR peak time, we circularly  
589 jittered the time as the procedure described above. This results in an empirical null  
590 distribution of reinstatement (i.e., correlation coefficient) for every time point around  
591 aSWR. We normalized the real reinstatement by z-scoring with mean and standard  
592 deviation of the null distribution. We referred to the resulting z-value as aSWR triggered  
593 reinstatement and it follows Gaussian distribution. We quantified the aSWR-locked  
594 reinstatement difference between the high/low arousal and between correct/incorrect  
595 discrimination at every time point by t-test, and corrected for the multiple comparisons  
596 using cluster-based nonparametric permutation test. Specifically, we performed the  
597 group-level comparisons using paired t-test and identified contiguous time bins with the  $p$   
598  $< 0.05$ , defined as clusters. The t-values within each cluster were summed as the cluster  
599 statistics. We created an empirical null distribution by shuffling the conditional trial labels  
600 1000 times where the maximum cluster statistics was identified for each permutation. It is  
601 considered as statistically significant if the real t-sum cluster statistics exceeded the 95%  
602 percentile of the null distribution.

603

#### 604 **Cross-structure joint aSWR-locked memory reinstatement**

605 The cross-structure joint aSWR-locked memory reinstatement was obtained by  
606 calculating the outer product between the structure-specific reinstatement traces  
607 (hippocampus and amygdala) during post-encoding aSWR windows. The resulting joint  
608 reinstatement matrices were averaged across the individual aSWRs for each subject,  
609 separately for later correctly or incorrectly discriminated trials. To assess the statistical  
610 significance of joint cross-structure memory reinstatement, we performed a Monte Carlo  
611 simulation to generate an empirical null distribution by circularly jittering the aSWR peak  
612 times. The reinstatement significance was defined as exceeding the 95% percentile of  
613 null distribution (Fig. 3d).

614

#### 615 **Dual states analyses**

616 Recorded periods were divided into low- and high-theta (3 - 10 Hz) or gamma (30 -  
617 250 Hz) periods, based on the subject-specific power median split. The aSWR  
618 occurrences are defined as the proportions of aSWRs occurring during each period. The  
619 aSWR occurrence comparisons between the low- and high-theta or gamma periods were  
620 performed using one-tailed Wilcoxon signed-rank test ( $p < 0.05$ ; Extended Data Figure 9).  
621

## 622 **Mutual information**

623 Mutual information (MI)<sup>14,21</sup> is a method for quantifying the amount of information  
624 shared between the variables of interest. In electrophysiology, MI is applied to test for the  
625 presence and directionality of information flow between the multiple time-series. We  
626 applied MI to assess the directional influence between the memory reinstatement in  
627 amygdala and hippocampus during the post-encoding aSWR windows (Fig. 3e). First, the  
628 structure-specific memory reinstatement traces from the amygdala and hippocampus  
629 were obtained around each aSWR event ( $\pm 250$  msec; see aSWR-locked memory  
630 reinstatement). Next, we calculated the MI between the amygdala and hippocampal  
631 memory reinstatement traces, using the 200 msec bin size (10 msec step size), covering  
632 the  $\pm 250$  msec window around aSWR peaks. For each time bin, the reinstatement  
633 strength was binned into 10 bins (with uniform bin count), consistently across the subjects  
634 and conditions. The MI between the time series X and Y was defined as  
635

$$636 \quad MI(X; Y) = \sum_i^n \sum_j^m p(x_i, y_j) \log_2 p(x_i, y_j) - \sum_i^n p(x_i) \log_2 p(x_i) - \sum_j^m p(y_j) \log_2 p(y_j)$$

637  
638  
639 , where  $p(x_i)$  and  $p(y_j)$  represented the marginal probability of signals X and Y,  $p(x_i, y_j)$   
640 indicated their joint probability, while m and n represented the numbers of reinstatement  
641 strength bins for time series X and Y<sup>14,21</sup>. To test the directionality of information flow, we  
642 calculated the time-lagged MI by shifting one time series relative to another across all the  
643 time bin combinations. The  $MI_{AMY \rightarrow HPC}$  and  $MI_{HPC \rightarrow AMY}$  at individual time bins were  
644 defined as the mean of all the subsequent time-lagged MI bins in the other region<sup>14,22</sup>.  
645 We defined the MI directional influence as the significant difference between the  
646  $MI_{AMY \rightarrow HPC}$  and  $MI_{HPC \rightarrow AMY}$ , assessed using Wilcoxon signed-rank test for each time  
647 bin. Correction for multiple comparisons was performed using the cluster-based  
648 nonparametric permutation test.

649

650 **References:**

- 651 1. Maris, E. & Oostenveld, R. *J. Neurosci. Methods*
- 652 (2007).doi:10.1016/j.jneumeth.2007.03.024
- 653 2. Leal, S.L., Tighe, S.K. & Yassa, M.A. *Neurobiol. Learn. Mem.* **111**, 41–48 (2014).
- 654 3. Peirce, J.W. *Front. Neuroinform.* **2**, 1–8 (2009).
- 655 4. Avants, B.B. et al. *Neuroimage* **54**, 2033–2044 (2011).
- 656 5. Oostenveld, R., Fries, P., Maris, E. & Schoffelen, J.M. *Comput. Intell. Neurosci.*
- 657 **2011**, (2011).
- 658 6. Ray, S. & Maunsell, J.H.R. *PLoS Biol.* **9**, (2011).
- 659 7. Lopes-dos-Santos, V. et al. *Neuron* **100**, 940-952.e7 (2018).
- 660 8. Wixted, J.T. et al. *Proc. Natl. Acad. Sci. U. S. A.* **111**, 9621–9626 (2014).
- 661 9. Canolty, R.T. & Knight, R.T. *Trends Cogn. Sci.* **14**, 506–515 (2010).
- 662 10. Wu, Z. & Huang, N.E. *Adv. Adapt. Data Anal.* **1**, 1–41 (2009).
- 663 11. Huang, N.E. et al. *Proc. R. Soc. A Math. Phys. Eng. Sci.* **454**, 903–995 (1998).
- 664 12. Moca, V. V., Bârzan, H., Nagy-Dăbâcan, A. & Mureşan, R.C. *Nat. Commun.* **12**, 1–
- 665 18 (2021).
- 666 13. Bârzan, H.2220–2224 (2020).
- 667 14. Cohen, M.X. *MIT Press* (2014).
- 668 15. Yaffe, R.B. et al. *Proc. Natl. Acad. Sci. U. S. A.* **111**, 18727–18732 (2014).
- 669 16. Lohnas, L.J. et al. *Proc. Natl. Acad. Sci. U. S. A.* **115**, E7418–E7427 (2018).
- 670 17. Zhang, H., Fell, J. & Axmacher, N. *Nat. Commun.* **9**, (2018).
- 671 18. Norman, Y. et al. *Science (80-. )*. **365**, (2019).
- 672 19. Pacheco Estefan, D. et al. *Nat. Commun.* **10**, (2019).
- 673 20. Staresina, B.P. et al. *Elife* **5**, 1–18 (2016).
- 674 21. Quian Quiroga, R. & Panzeri, S. *Nat. Rev. Neurosci.* **10**, 173–185 (2009).
- 675 22. Helfrich, R.F. et al. *Nat. Commun.* **10**, 1–16 (2019).
